# Supplementary material for: Aqueous synthesis of highly fluorescent and stable Cu–In–S/ZnS core/shell nanocrystals for cell imaging
Source: Royal Society of Chemistry journal article supplement (doi:10.1039/c7ra10215a), 2017-01-01
Supplement: c7ra10215a1.pdf [file c7ra10215a1.pdf]

Electronic Supplementary Information for:

## Aqueous synthesis of highly fluorescent and stable Cu-In-S/ZnS core/shell nanocrystals for cell imaging

Chun-Nan Zhu, Dong-Yun Zheng, Hui-Min Cao, Shan-Ying Zhu and Xiao-Jun Liu\*

Hubei Key Laboratory of Medical Information Analysis and Tumor Diagnosis & Treatment, Key Laboratory of Cognitive Science (State Ethnic Affairs Commission), and College of Biomedical Engineering, South-Central University for Nationalities, Wuhan 430074, P. R. China.

\*Corresponding author: Xiao-Jun Liu (E-mail: liuxj@mail.scuec.edu.cn)

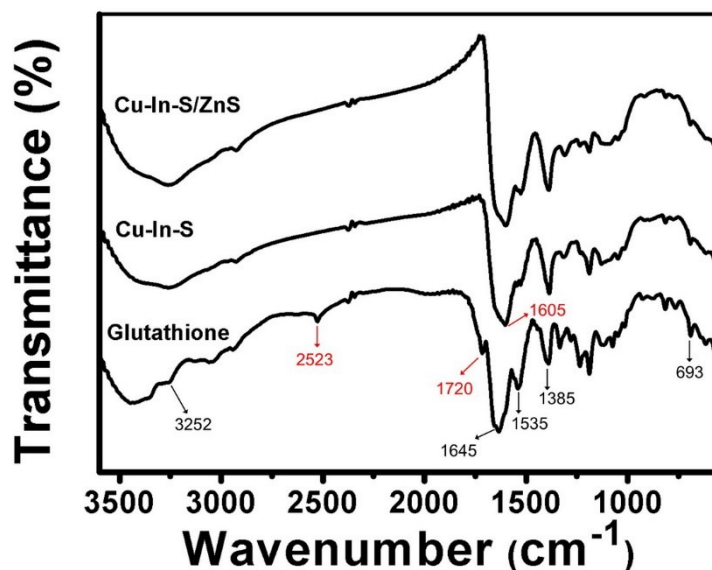

**Fig. S1** FT-IR spectra of glutathione, Cu-In-S NCs, and Cu-In-S/ZnS NCs. The N-H stretching vibration and wagging vibration peaks appeared at 3252 and 693 cm<sup>-1</sup>, respectively. The peaks at 1645, 1535, and 1385 cm<sup>-1</sup> can be attributed to amide I, amide II, and amide III bands. For Cu-In-S NCs and Cu-In-S/ZnS NCs, the characteristic peak of free thiol groups at 2523 cm<sup>-1</sup> disappeared,<sup>1,2</sup> which confirmed that thiol groups in glutathione have covalently bound with the metal atoms on the surface of NCs. Moreover, the C=O stretching vibration of -COOH shifted from 1720 to 1605 cm<sup>-1</sup>, which can be ascribed to the deprotonation of -COOH.<sup>3</sup>

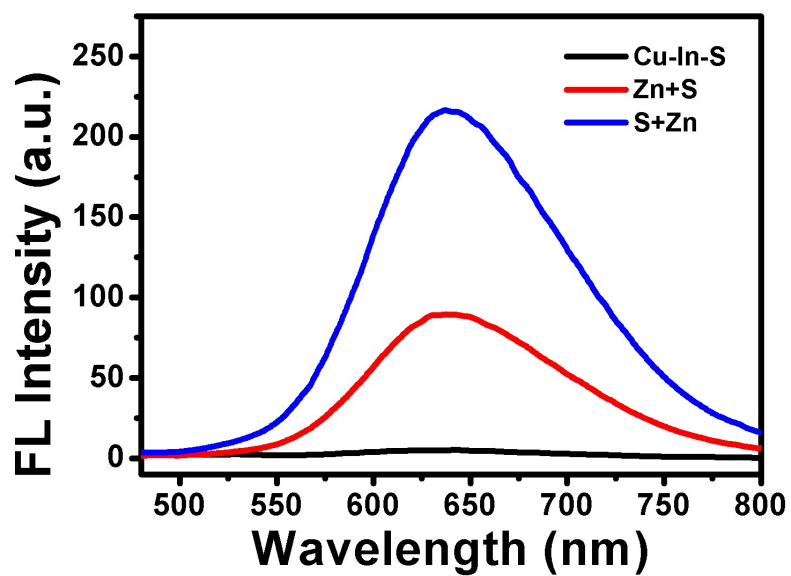

**Fig. S2** Comparison of FL intensity of the products with different adding sequence of first Zn and then S precursors (red line), and first S and then Zn precursors (blue line).

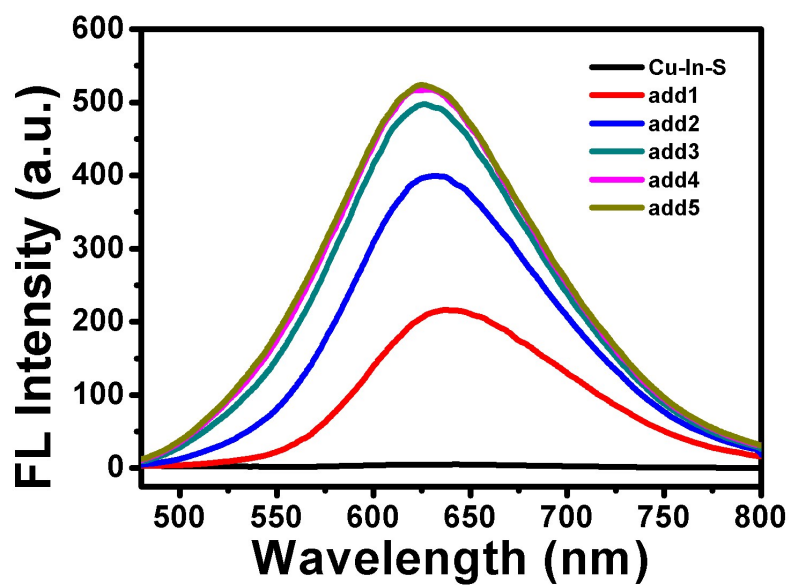

**Fig. S3** FL emission spectra of Cu-In-S/ZnS NCs with different addition times of S and Zn precursors.

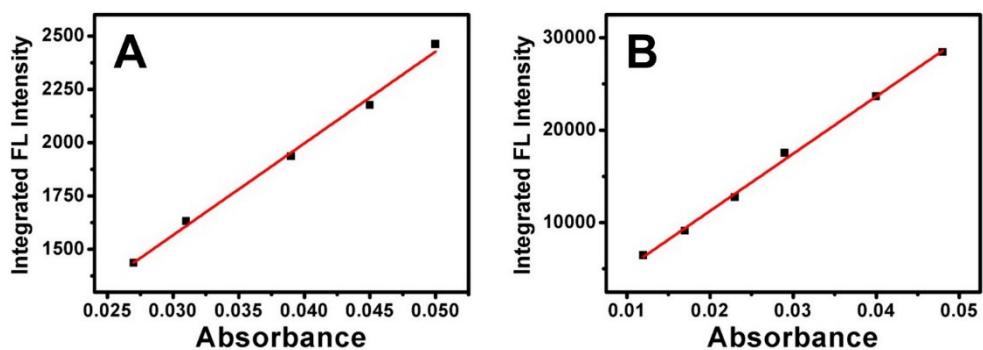

**Fig. S4** Integrated FL intensity vs. optical density (absorbance) of Cu-In-S/ZnS NCs in water (A) and R6G in ethanol (B).

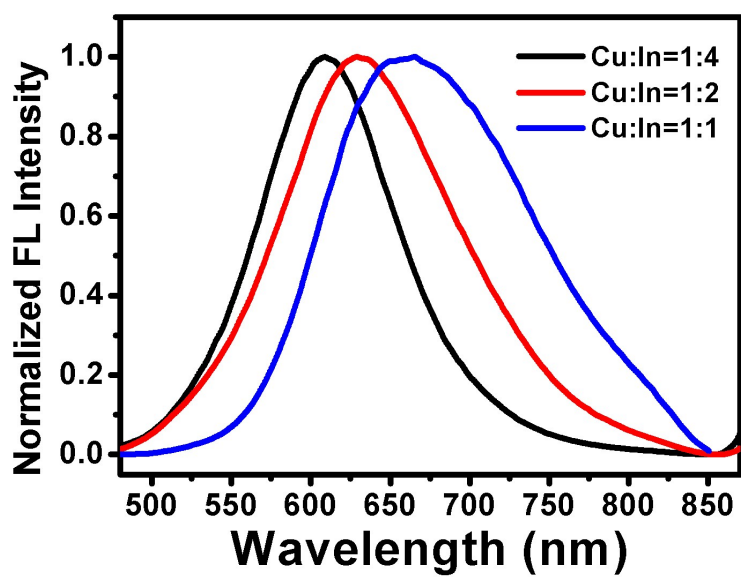

**Fig. S5** FL emission spectra of Cu-In-S/ZnS NCs with different Cu/In raw ratios.

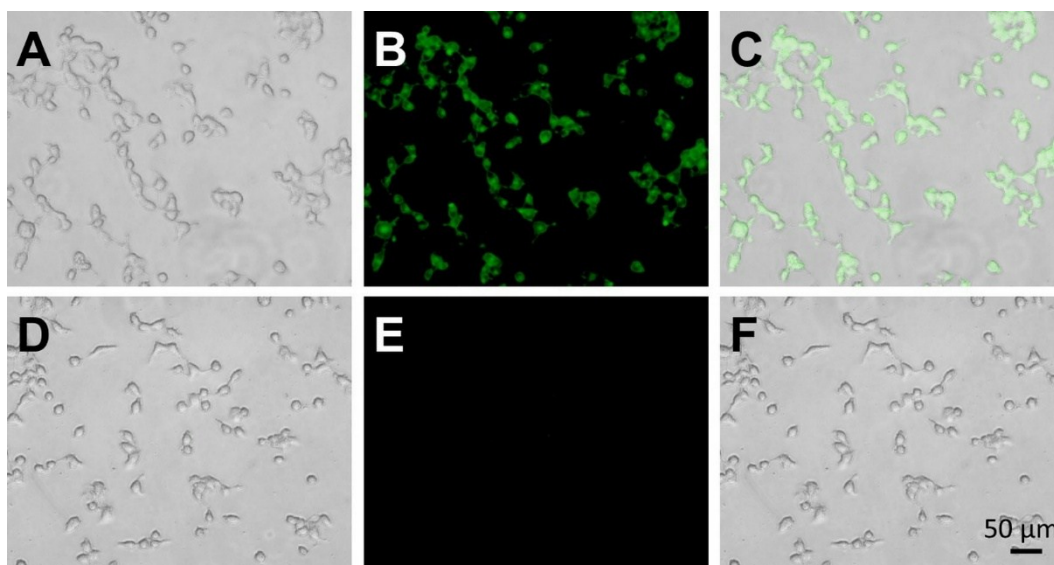

**Fig. S6** Bright-field images, FL images, and the merged images of CAL-27 cells after the incubation with FITC-WGA (A, B, and C) and FITC (D, E, and F). CAL-27 cells showed strong green FL after treated with FITC-WGA, and almost no green FL with FITC, indicating abundant WGA receptors on the membrane of CAL-27 cells.

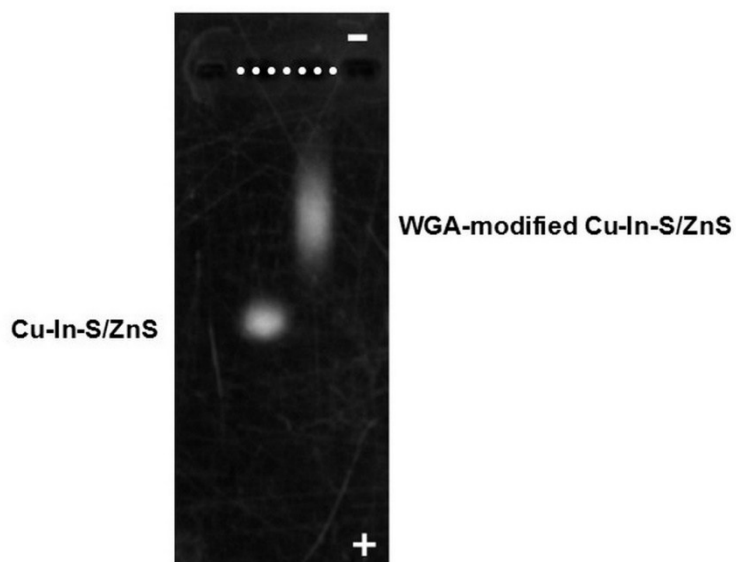

**Fig. S7** Agarose gel electrophoresis result of WGA-modified Cu-In-S/ZnS NCs and Cu-In-S/ZnS NCs at the mode of FL field. The dashed line indicates the location of the loading wells.

## References

- (1) S. L. Cumberland, M. G. Berrettini, A. Javier and G. F. Strouse, *Chem. Mater.*, 2003, **15**, 1047-1056.
- (2) L. Wu, B. G. Quan, Y. L. Liu, R. Song and Z. Y. Tang, *ACS Nano*, 2011, **5**, 2224-2230.
- (3) E. M. Kim, S. T. Lim, M. H. Sohn and H. J. Jeong, *J. Nanopart. Res.*, 2017, **19**, 251.
